# Supplementary material for: Determination of the ion-conduction properties of Na3OBr and its dominant defect species
Source: Royal Society of Chemistry journal article supplement (doi:10.1039/d3ta04318e), 2023-01-01
Supplement: d3ta04318e1.pdf [file d3ta04318e1.pdf]

## Supplementary information

### Determination of the ion-conduction properties of Na<sub>3</sub>OBr and its dominant defect species

Reona Miyazaki<sup>1\*</sup>, Shiori Ito<sup>1</sup>, Kana Ishigami<sup>2</sup>, Hidetoshi Miyazaki<sup>1</sup>, and Takehiko Hihara<sup>1</sup>

*1 Department of Physical Science and Engineering, Graduate School of Engineering,*

*Nagoya Institute of Technology, Gokiso-cho, Showa, Nagoya 466-8555, Japan*

*2 Creative Engineering Program, Graduate School of Engineering,*

*Nagoya Institute of Technology, Gokiso-cho, Showa, Nagoya 466-8555, Japan*

## 1. Particle morphology of the Na<sub>2</sub>O/Na mixed powder

Na<sub>2</sub>O (purity 80 %, Aldrich) and pieces of Na metal were mixed by S. S. mortar, resulting in a fine mixed powder. Fine powders with several micro meters were aggregated and coalesced.

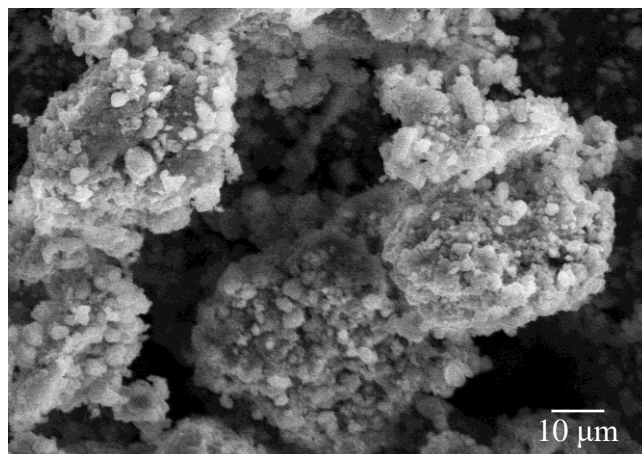

Figure S1: SEM image of Na<sub>2</sub>O/Na mixed powder before the purification

## 2. XRD patterns of Ca<sup>2+</sup>-doped Na<sub>3</sub>OBr

Fig. S2(a) shows XRD patterns of Ca<sup>2+</sup>-doped Na<sub>3</sub>OBr. Compositional dependence of lattice parameters and 110 peak widths are presented in Fig. S2(b). Lattice parameter of Na<sub>3</sub>OBr was decreased for lower Ca<sup>2+</sup> concentration, which is explained by the substitution of Na<sup>+</sup> (1.02 Å) by smaller Ca<sup>2+</sup> (1.00 Å). On the other hand, further increase of Ca<sup>2+</sup> concentration resulted in the lattice expansion. By increasing Ca<sup>2+</sup> concentration, the peak widths were broadened although the samples were post-annealed under the same conditions (350 °C for 2 hours). The lattice disordering by vacancies has been reported for *e.g.*, ion-irradiated CeO<sub>2</sub> [*Quantum Beam Sci.* 2020, **4**, 26]. Although the relation between the lattice disordering and the cation vacancies in Na<sub>3</sub>OBr has not been specifically investigated, at present, we believe that the peak broadening for higher Ca<sup>2+</sup> concentration is owing to the increase of Na<sup>+</sup> vacancies. The results in Fig. S2 indicate the positive correlation between the peak broadening and the lattice expansion by Ca<sup>2+</sup> doping. The increase of lattice parameters by vacancies has been reported for some ceramics (*e.g.*, CeO<sub>2</sub> and KCl) [*Thin Solid Films*, 207 (1992) 288, C. Kittel, *Introduction to Solid State Physics 7th edition, Chap. 18, 542-543*]. Hence, it is predicted that cation vacancies contribute for the expansion of Na<sub>3</sub>OBr lattice. The non-linear variation of the lattice parameters in Fig. S2 can be explained by the competing effects of the substitution of Ca<sup>2+</sup> ions (lattice shrinkage) and the introduction of cation vacancies (lattice expansion).

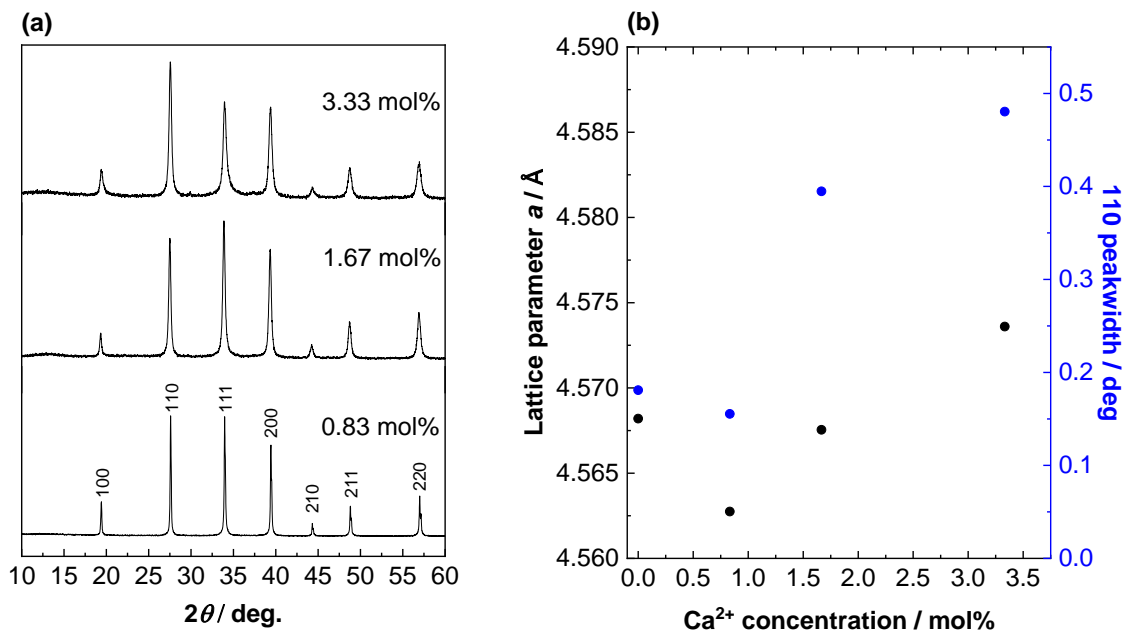

Figure S2: XRD patterns of Ca<sup>2+</sup>-doped Na<sub>3</sub>OBr. Bottom, middle and top data represent the Ca concentration of 0.83, 1.67 and 3.33 mol%, respectively. (b): Compositional dependence of lattice parameters (black) and 110 peak widths (blue).

### 3. Variations of the relative peak intensity ratio of Na<sub>3</sub>OBr with/without excess Br<sup>-</sup> on O<sup>2-</sup> sites

The relative intensities of the diffraction peaks of Na<sub>3</sub>OBr were clearly changed by introducing the excess Br<sup>-</sup> on O<sup>2-</sup> sites with Na vacancies. The most significant variation is the intensity ratio of 110/111 peaks. Relative intensity of 110 was increased for Na<sub>3</sub>OBr with the excess Br<sup>-</sup> (5 mol%) on O<sup>2-</sup> sites and Na vacancies (5 mol%) compared to the perfect crystal.

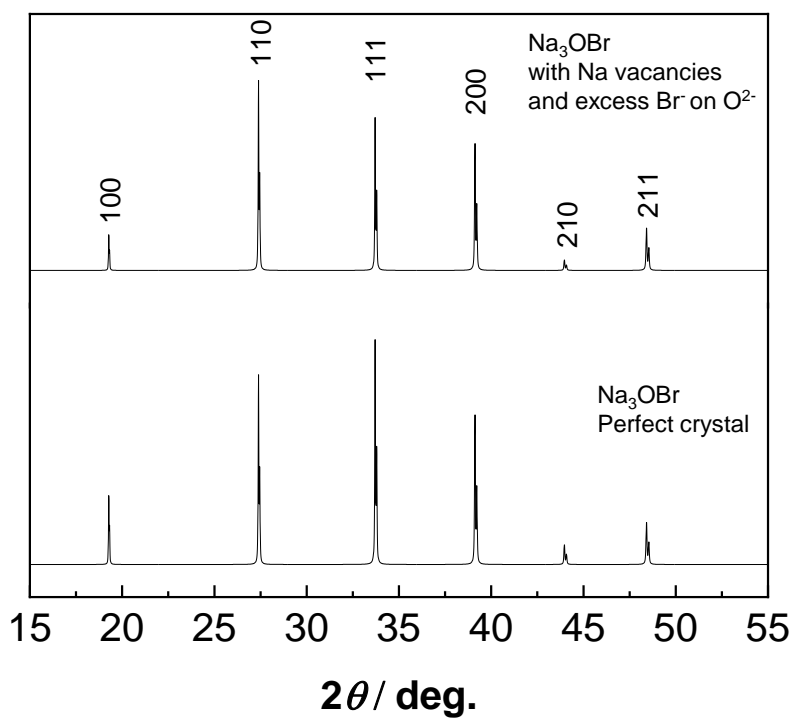

Figure S3: Simulated XRD patterns of Br<sup>-</sup>-rich and perfect Na<sub>3</sub>OBr

4. Compositional dependence of the lattice parameters for Br<sup>-</sup>-rich Na<sub>3</sub>OBr

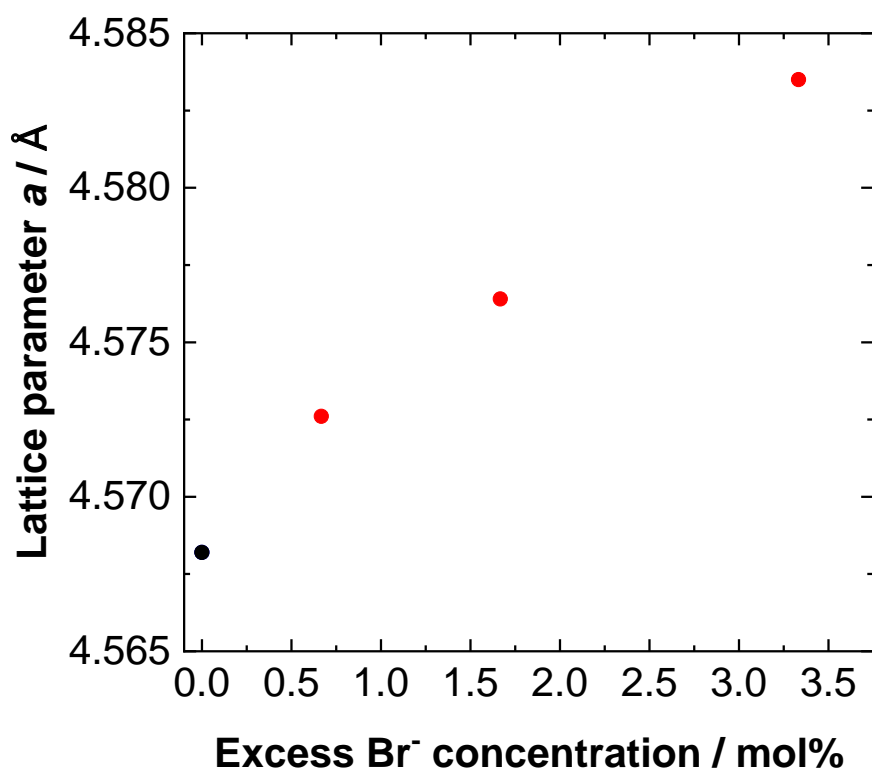

Figure S4: The lattice parameters of Na<sub>3</sub>OBr with excess Br<sup>-</sup> concentration. The data for non-doped Na<sub>3</sub>OBr is plotted by black circle.

## 5. XRD pattern of $\text{Ca}^{2+}$ -doped $\text{Na}_3\text{OBr}$ after sintering above $400\text{ }^\circ\text{C}$

To densify the pellet,  $\text{Ca}^{2+}$ -doped  $\text{Na}_3\text{OBr}$  was sintered at  $600\text{ }^\circ\text{C}$  for 1 h in a glove box. After sintering, *RP* phase ( $\text{Na}_4\text{OBr}_2$ ) was observed, indicating the decomposition of *AP* phase. The segregation of the *RP* phase (Br-rich phase) indicates the presence of residual  $\text{Na}_2\text{O}$  followed by the decomposition reaction ( $2\text{Na}_3\text{OBr} \rightarrow \text{Na}_4\text{OBr}_2 + \text{Na}_2\text{O}$ ). However, diffraction peaks of  $\text{Na}_2\text{O}$  were not confirmed in this study. The detailed mechanism of the phase separation into *RP* and *AP* phases has not been understood.

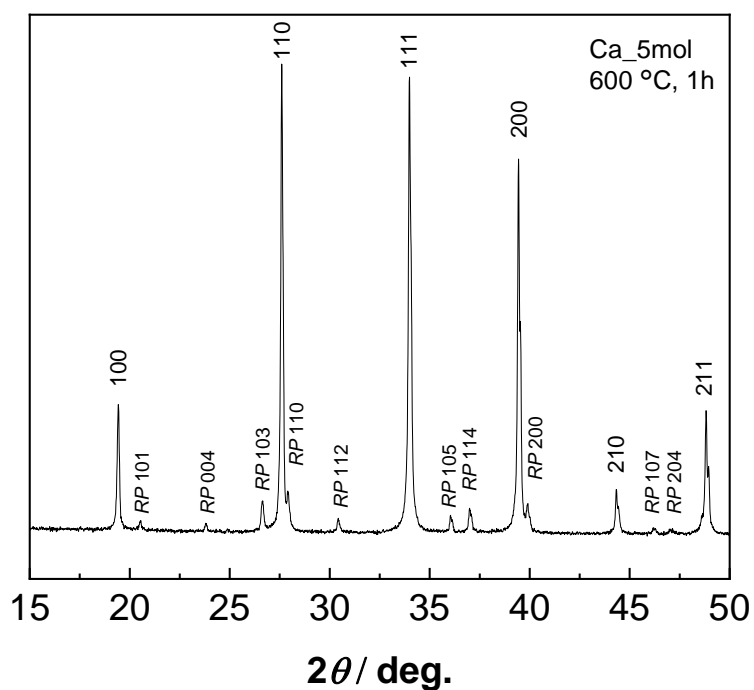

Figure S5: XRD pattern of  $\text{Ca}^{2+}$ -doped  $\text{Na}_3\text{OBr}$  after sintering at  $600\text{ }^\circ\text{C}$  in a glove box

## 6. Crystallite size and lattice strain of Na<sub>3</sub>OBr

Crystallite size and lattice strain of as-milled, sintered at 400 °C and hot-pressed Na<sub>3</sub>OBr were estimated from the peak width of XRD patterns. The calculations were based on the data obtained by MiniFlex ( $\lambda = 1.54 \text{ \AA}$ ).

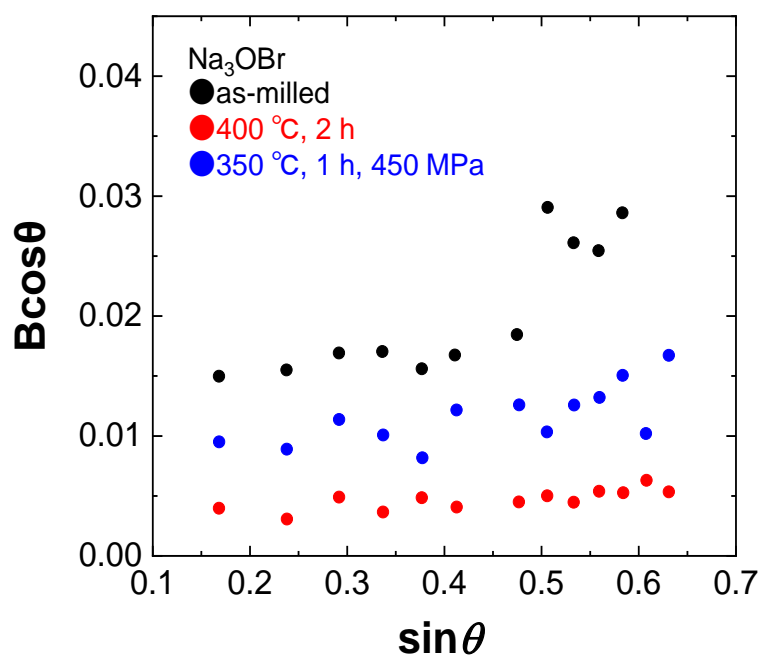

Figure S6: Williamson-Hall plots of Na<sub>3</sub>OBr prepared under three conditions

Table S1: Crystallite size and lattice strain of Na<sub>3</sub>OBr estimated from Williamson-Hall plots

| Na <sub>3</sub> OBr | Crystallite size / nm | Lattice strain |
|---------------------|-----------------------|----------------|
| As-milled           | 22                    | 0.032          |
| 400 °C, 2h          | 55                    | 0.0044         |
| 350 °C, 1h, 450 MPa | 23                    | 0.0112         |



## 7. Variation of the crystalline phase after conductivity measurement

measurement

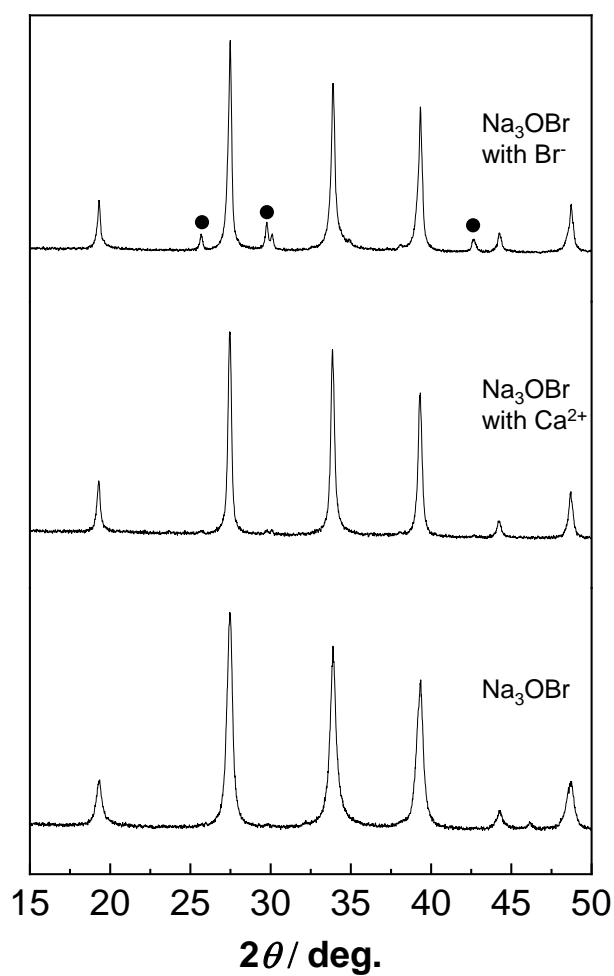

Figure S7: XRD patterns of  $\text{Na}_3\text{OBr}$ -based materials after conductivity measurement. Diffraction peaks of  $\text{NaBr}$  are presented by black circles.
